# Supplementary material
Source: publisher site journal article supplement (https://www.spandidos-publications.com/7788/downloadSupplementary)

Figure S1. Representative staining images of AE1/AE3 immunohistochemistry. (A) Negative expression and (B) positive expression.

**A**

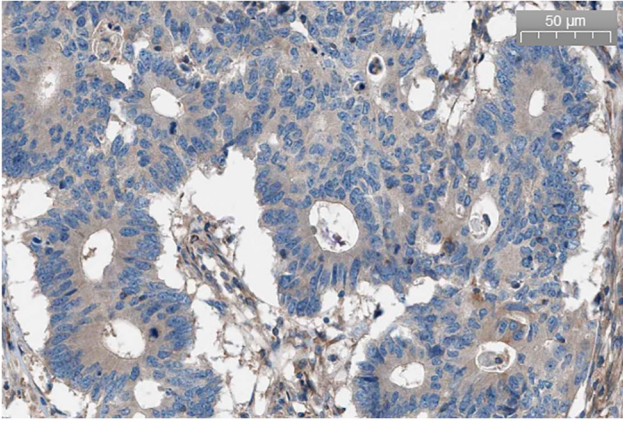

**B**

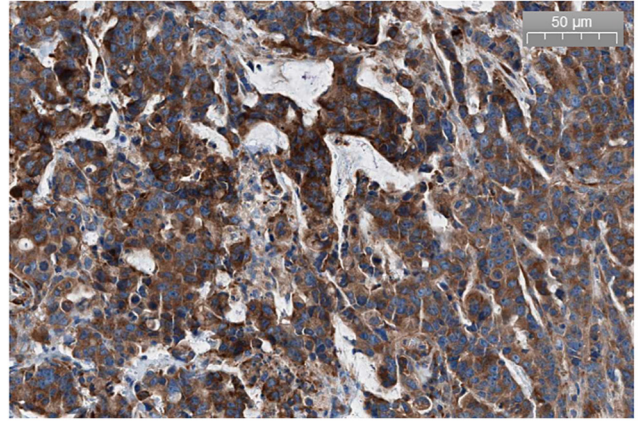

Figure S2. Survival curves of patients with colorectal neuroendocrine carcinoma in different age groups. (A) Disease free survival and (B) overall survival curves.

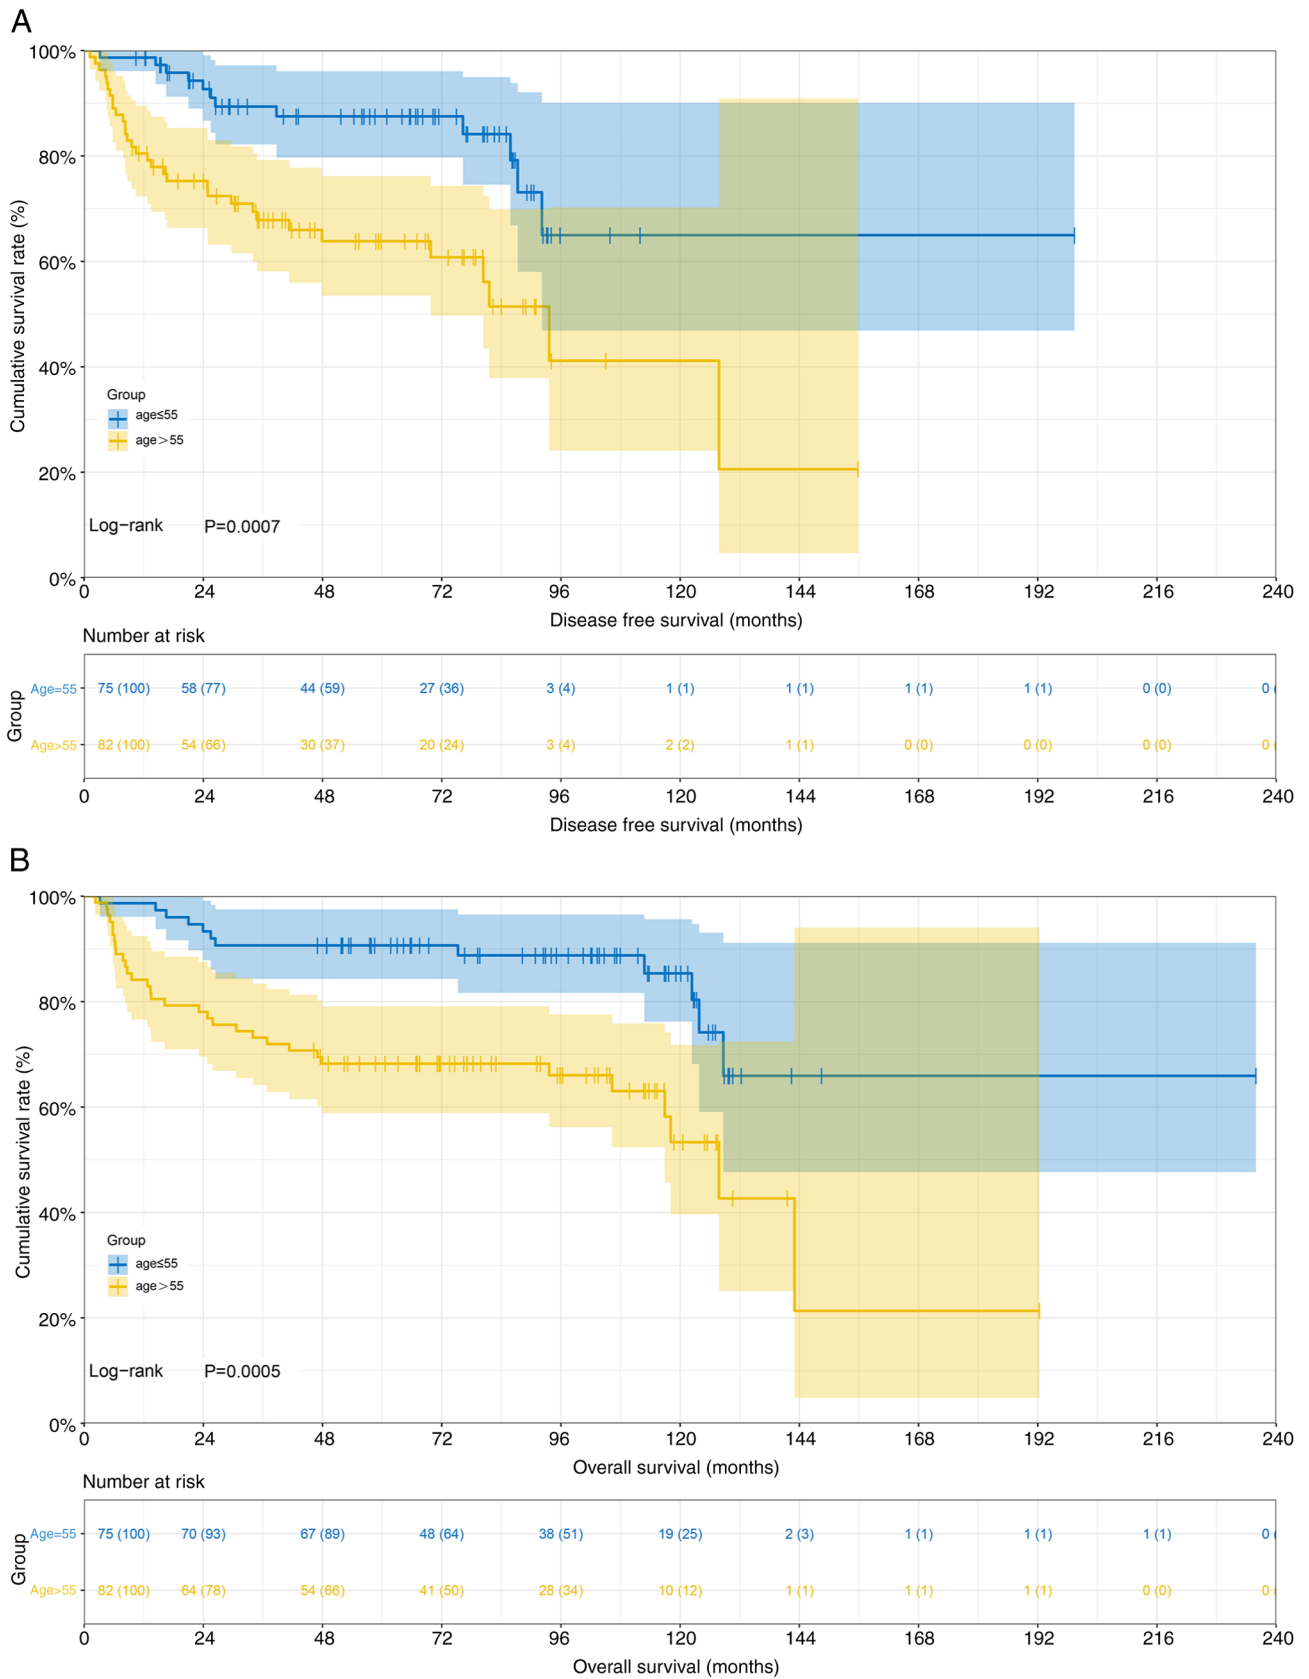

Supplement: Supplementary file 1 [file downloadSupplementary]
